# Supplementary material for: Tuning supported Ni catalysts by varying zeolite Beta heteroatom composition: effects on ethylene adsorption and dimerization catalysis
Source: Royal Society of Chemistry journal article supplement (doi:10.1039/d1cy00308a), 2021-01-01
Supplement: d1cy00308a1.pdf [file d1cy00308a1.pdf]

## Supporting Information

# Tuning supported Ni catalysts by varying zeolite Beta heteroatom composition: effects on ethylene adsorption and dimerization catalysis

*Michael Meloni<sup>1</sup>, Ron C. Runnebaum<sup>1,2,\*</sup>*

<sup>1</sup>Department of Chemical Engineering, University of California, Davis, CA, 95616 USA

<sup>2</sup>Department of Viticulture & Enology, University of California, Davis, CA, 95616 USA

One Shields Ave., University of California, Davis, CA 95616 USA

# Table of Contents

## Experimental Details

N<sub>2</sub> physisorption

Acid site Titration

## Supporting Figures

Table S1. Rate of deactivation for catalysts.

Table S2. Si/X ratios from acid site titration and elemental analysis.

Table S3. Surface areas and micropore volumes of catalysts derived from nitrogen physisorption.

Figure S1. C<sub>2</sub>H<sub>4</sub> adsorption/desorption spectra of Ni-[Ga]-Beta.

Figure S2-S5. CO adsorption spectra of each catalyst.

Figure S6. NO adsorption FTIR spectra.

Figure S7-S9. Catalysis of each catalyst in the presence and absence H<sub>2</sub>.

Figure S10. Butene selectivities in the presence of H<sub>2</sub>.

Figure S11-S12. N<sub>2</sub> physisorption of catalysts and supports.

Figure S13-S14. PXRD of catalysts and supports.

Figure S15. OH region of C<sub>2</sub>H<sub>4</sub> adsorption FTIR adsorption spectra.

Figure S16. CO adsorption FTIR spectra of AP catalysts.

## Supporting Information.

**N<sub>2</sub> Physisorption.** Samples, loaded into a capped tube in the glovebox to exclude exposure to moisture and air, were transferred to a Micromeritics 3Flex instrument and degassed at 350°C for 4 h before measurements under dynamic vacuum. Samples were weighed in a glovebox before and after analysis to ensure a dry weight was obtained. N<sub>2</sub> adsorption isotherms were taken at -196°C. BET surface area was determined in the relative pressure range 0.001-0.05. Micropore volume was calculated using the t-plot method using Harkins-Jura thickness equation relating relative pressure to thickness of adsorbed layer.

**Acid Site Titration.** Acid site titration with isopropylamine was performed in a Netzsch Jupiter F209 TGA-MS. The sample was exposed to isopropylamine in-situ at 30°C. The sample was then heated to 527°C at 5°C/min in N<sub>2</sub>, 80mL/min total flow, with a 1 hour hold at 180°C to remove physisorbed isopropylamine. The mass to charge ratios 17 (ammonia), 41 (propene), 44 (isopropylamine), and 58 (isopropylamine) were monitored during the experiment.

**Table S1.** Rate of deactivation of catalysts of the last 3 h of catalysis.

| Catalyst       | Deactivation over 3 h |                |                                    |
|----------------|-----------------------|----------------|------------------------------------|
|                | No H <sub>2</sub>     | H <sub>2</sub> | H <sub>2</sub> – No H <sub>2</sub> |
| Ni-[Al]-Beta   | 25%                   | 17%            | -8%                                |
| Ni-[Ga]-Beta   | 30%                   | 25%            | -5%                                |
| Ni-[Fe]-Beta   | 20%                   | 18%            | -2%                                |
| Ni-[DeAl]-Beta | 91%                   | -              | -                                  |

**Table S2.** Acid site density, Si/X, and Ni/X of [X]-Beta zeolites. <sup>a</sup>Determined via isopropylamine titration, <sup>b</sup>determined via ICP-MS.

| Heteroatom | Acid Site Density <sup>a</sup><br>[ $\mu\text{mol/g}$ ] | Si/X <sup>a</sup> | Si/X <sup>b</sup> | Ni/H <sup>+</sup> | Ni/X <sup>b</sup> |
|------------|---------------------------------------------------------|-------------------|-------------------|-------------------|-------------------|
| Al         | 735                                                     | 22                | 19                | 0.24              | 0.21              |
| Ga         | 616                                                     | 25                | 24                | 0.27              | 0.27              |
| Fe         | 712                                                     | 22                | 19                | 0.24              | 0.22              |

**Table S3.** Surface areas and micropore volumes of catalysts derived from nitrogen physisorption

| Extra-Framework Cation | Heteroatom | BET SA [ $\text{m}^2/\text{g}$ ] | Micropore Vol [ $\text{cm}^3/\text{g}$ ] | External SA [ $\text{m}^2/\text{g}$ ] |
|------------------------|------------|----------------------------------|------------------------------------------|---------------------------------------|
| Na <sup>+</sup>        | B          | 699                              | 0.239                                    | 68.5                                  |
| H <sup>+</sup>         | Ga         | 665                              | 0.199                                    | 159                                   |
| Ni, H <sup>+</sup>     | Ga         | 643                              | 0.188                                    | 169                                   |
| H <sup>+</sup>         | Al         | 694                              | 0.204                                    | 174                                   |
| Ni, H <sup>+</sup>     | Al         | 690                              | 0.201                                    | 184                                   |
| -                      | DeAl       | 599                              | 0.17                                     | 156                                   |
| Ni                     | DeAl       | 632                              | 0.19                                     | 145                                   |
| H <sup>+</sup>         | Fe         | 705                              | 0.204                                    | 186                                   |
| Ni, H <sup>+</sup>     | Fe         | 695                              | 0.220                                    | 128                                   |

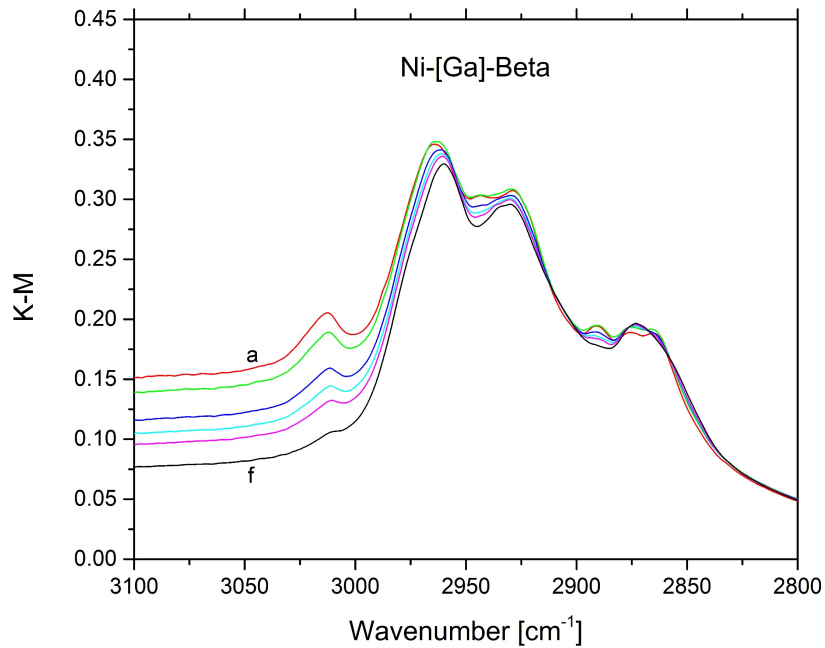

**Figure S1.**  $C_2H_4$  adsorption onto oxidized Ni-[Ga]-Beta catalyst.  $C_2H_4$  was pulsed into drifts cell and purged from a to f. Spectra show butene bands desorb over time.

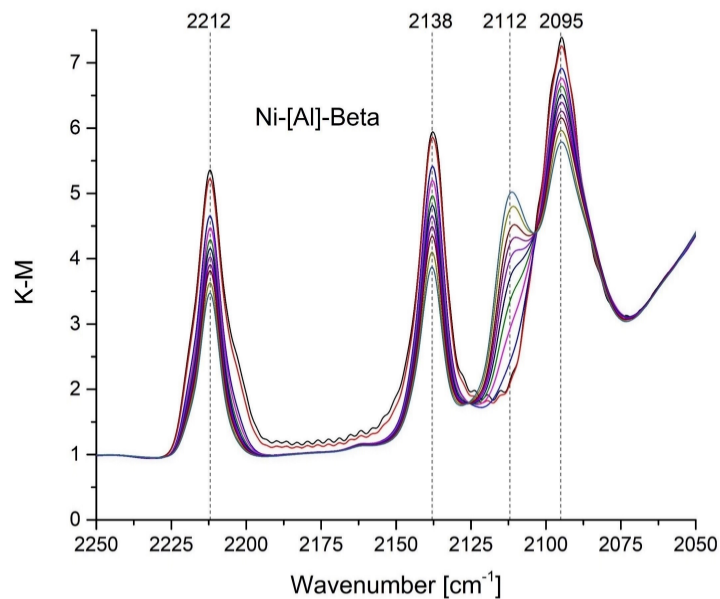

**Figure S2.** CO adsorption at 30°C after reduction with CO at 300 ° C onto Ni-[Al]-Beta, spectra after CO pulse a-f.

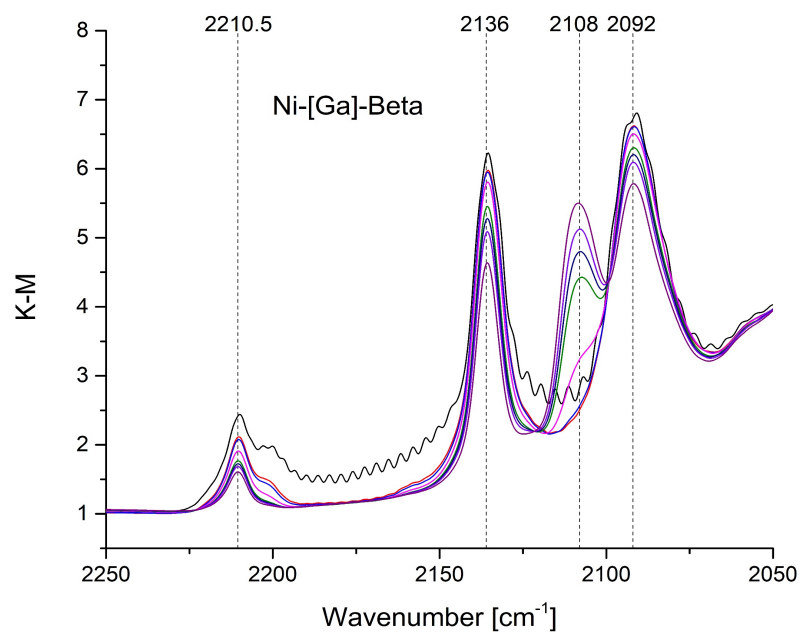

**Figure S3.** CO adsorption at 30°C after reduction with CO at 300°C

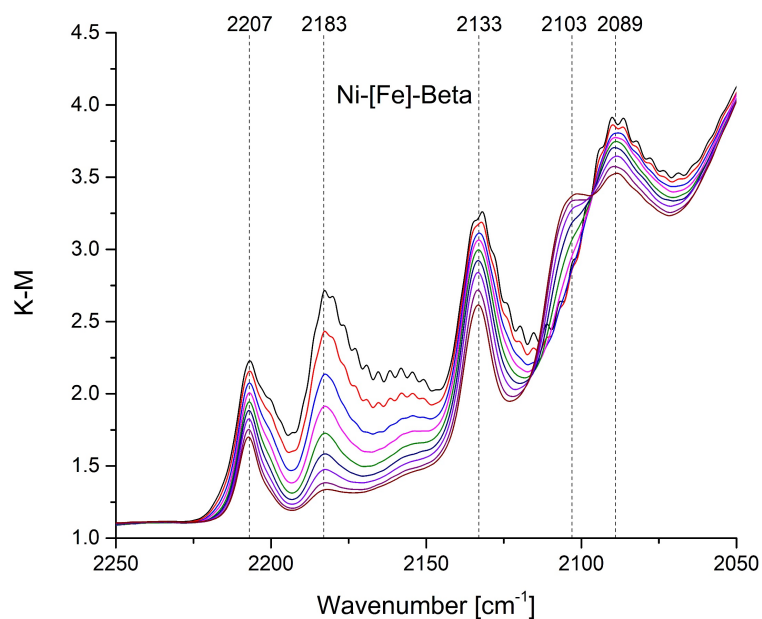

**Figure S4.** CO adsorption at 30°C after reduction with CO at 300°C onto Ni-[Fe]-Beta, spectra after CO pulse a-f. Bands at 2207, 2133, 2103, 2089 cm<sup>-1</sup> correspond to Ni carbonyls while the band at 2183 cm<sup>-1</sup> corresponds to extraframework Fe<sup>2+</sup> carbonyl.

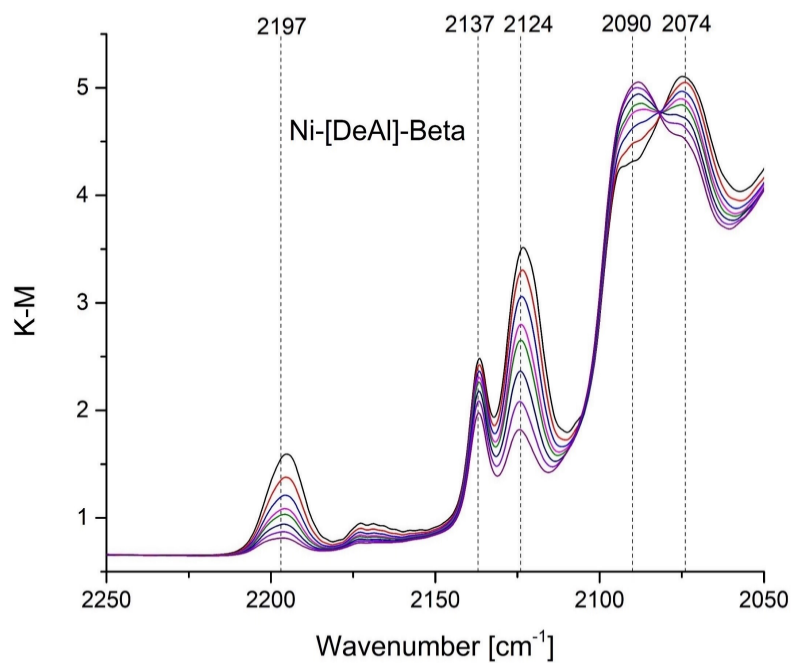

**Figure S5.** CO adsorption at 30°C after reduction with CO at 300 ° C onto Ni-[DeAl]-Beta, spectra after CO pulse a-f.

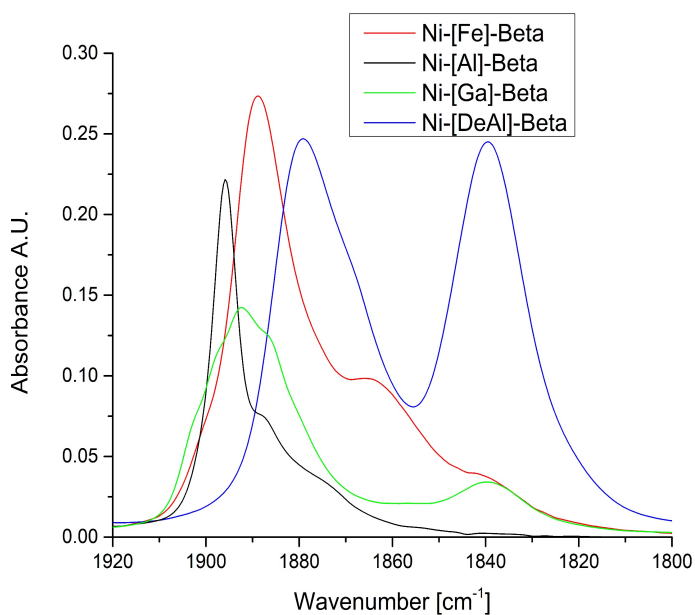

**Figure S6.** NO adsorption at room temperature onto oxidized Ni-[X]-Beta, where X= Al, Ga, Fe, or DeAl.



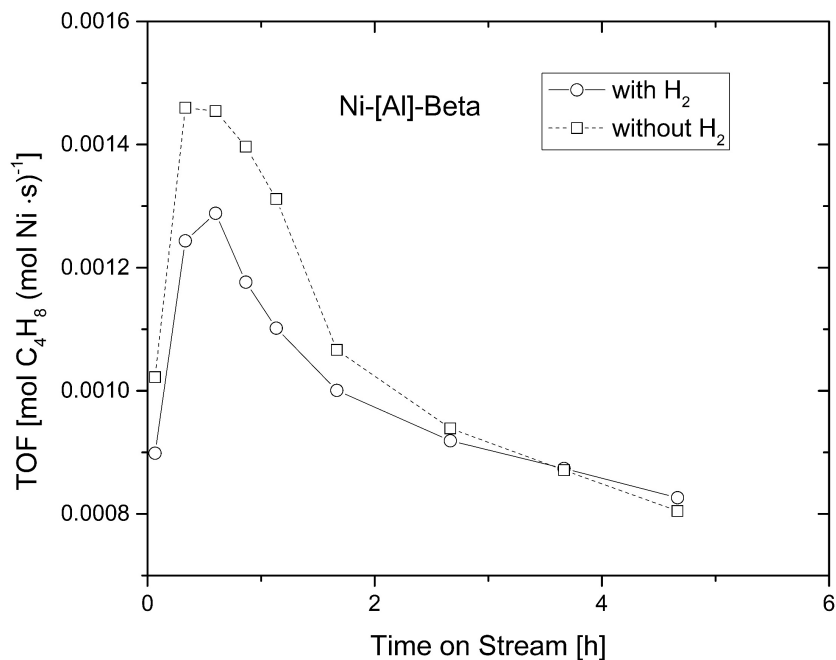

**Figure S7.** TOF of Ni-[Al]-Beta with and without H<sub>2</sub>. The addition of H<sub>2</sub> reduces of the TOF but decrease the rate of deactivation.

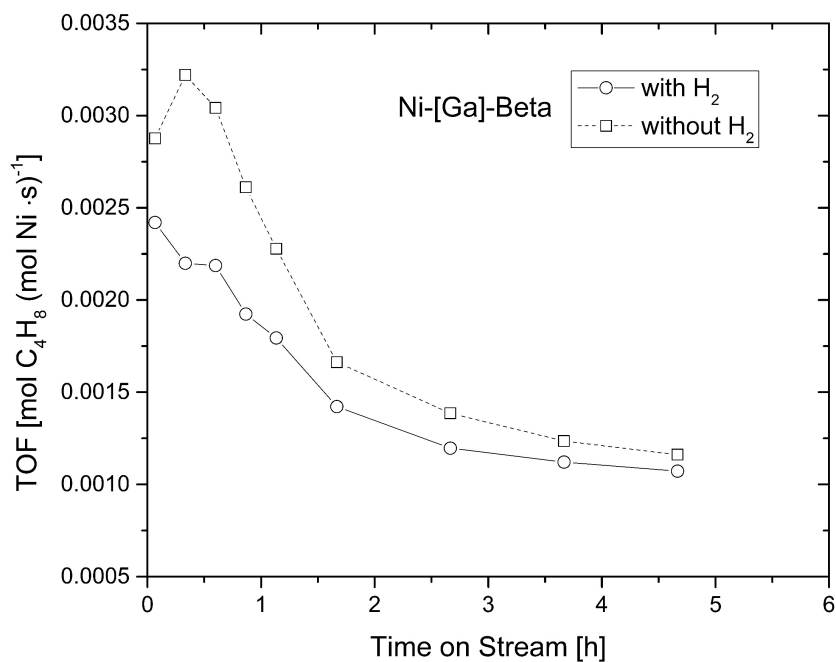

**Figure S8.** TOF of Ni-[Ga]-Beta with and without H<sub>2</sub>. The induction period is not observed in the presence of H<sub>2</sub>. The TOF decreases in the presence of H<sub>2</sub>.

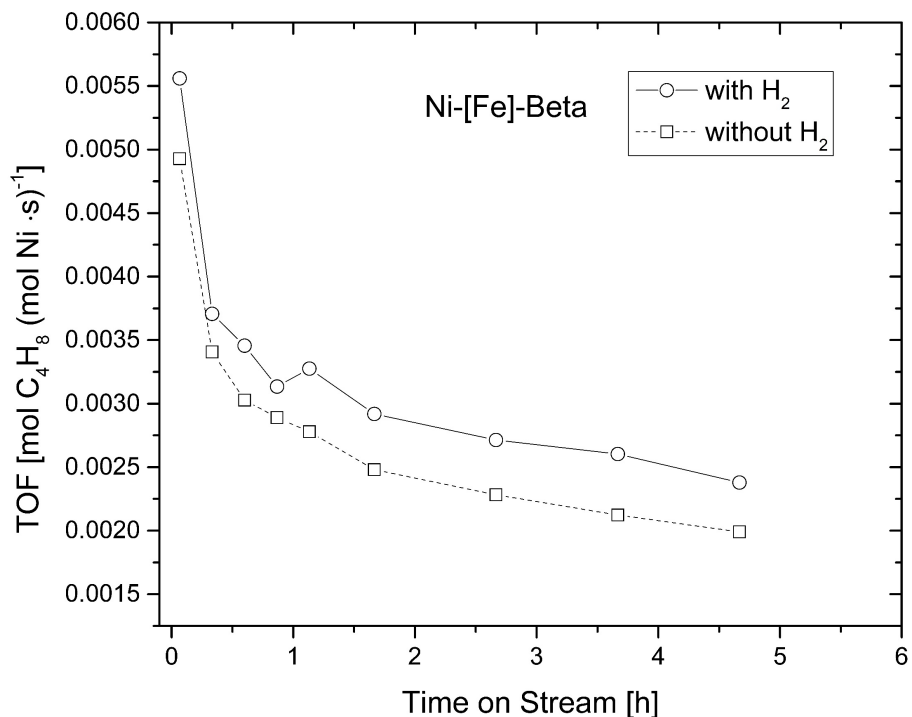

**Figure S9.** TOF of Ni-[Fe]-Beta with and without H<sub>2</sub>. The activity is increased in the presence of H<sub>2</sub>, the rate of deactivation is not significantly altered.

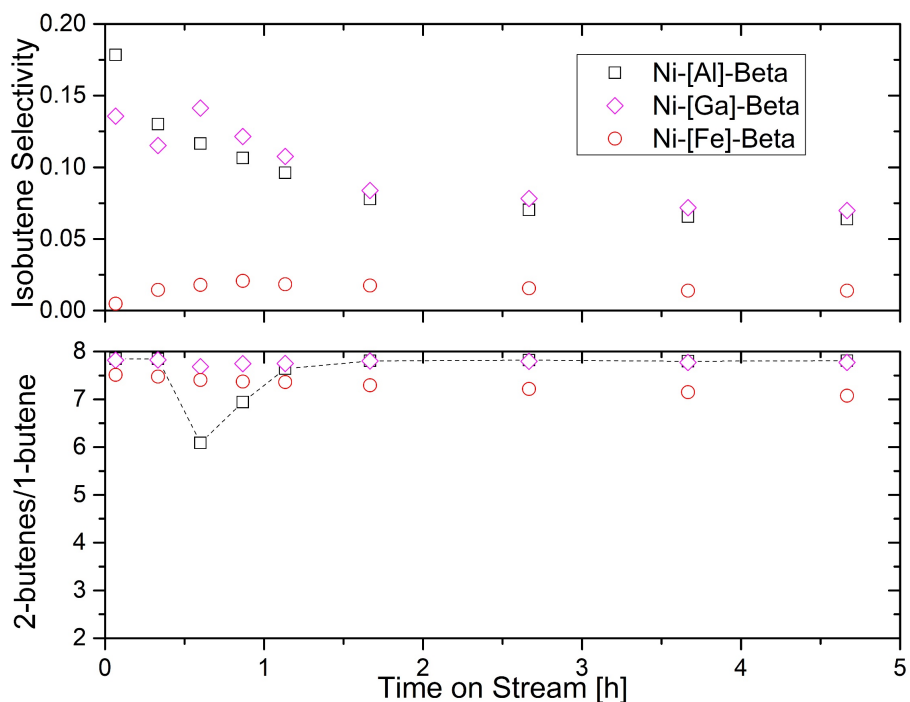

**Figure S10.** Top: Selectivity of isobutene relative to total butene formation. Bottom: ratio of total 2-butene formation to 1-butene. Results for dimerization carried out in the presence of H<sub>2</sub>.

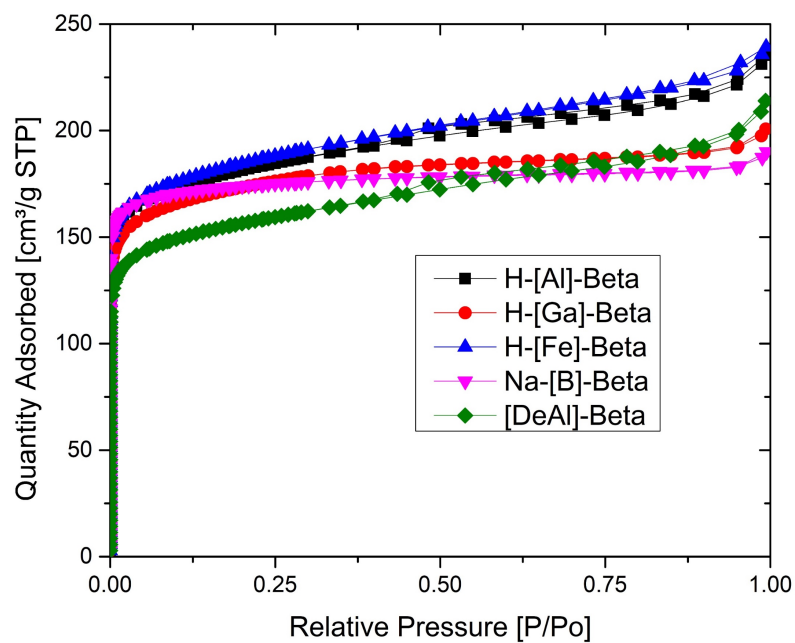

**Figure S11.** N<sub>2</sub> physisorption isotherms for supports without dispersed Ni.

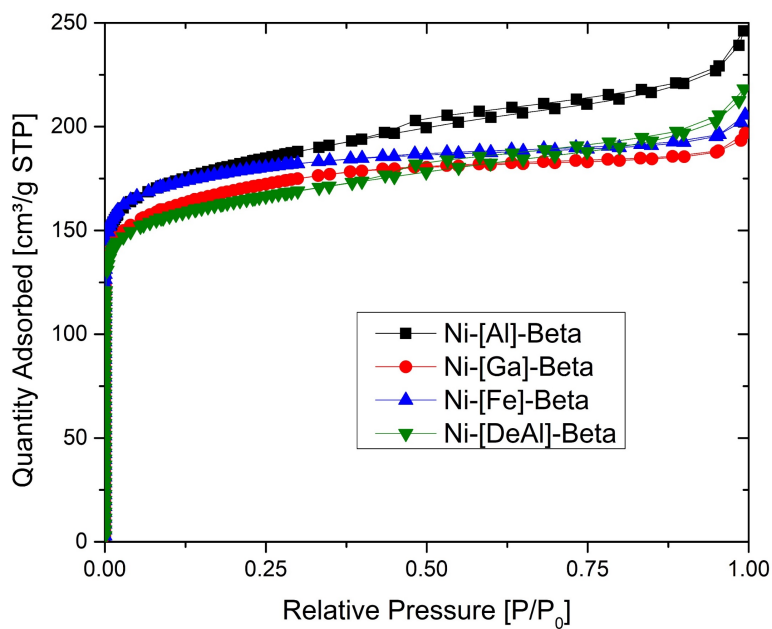

**Figure S12.** N<sub>2</sub> physisorption isotherms for catalysts with dispersed Ni

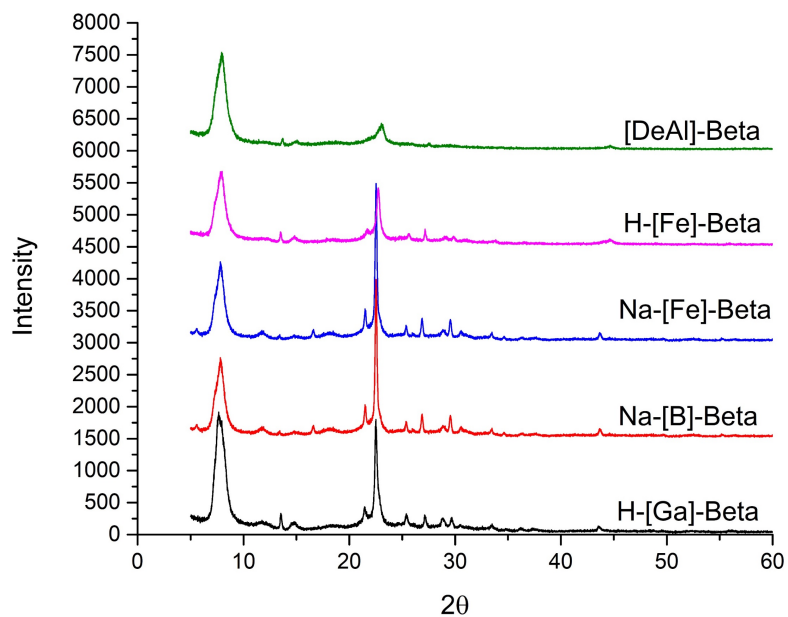

**Figure S13.** Powder XRD spectra for Beta supports without dispersed Ni

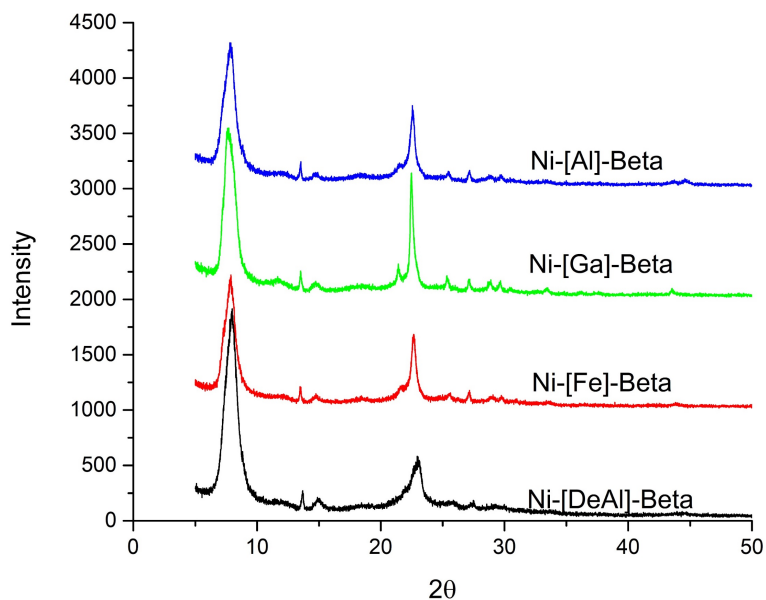

**Figure S14.** Powder XRD spectra for Beta catalysts with dispersed Ni

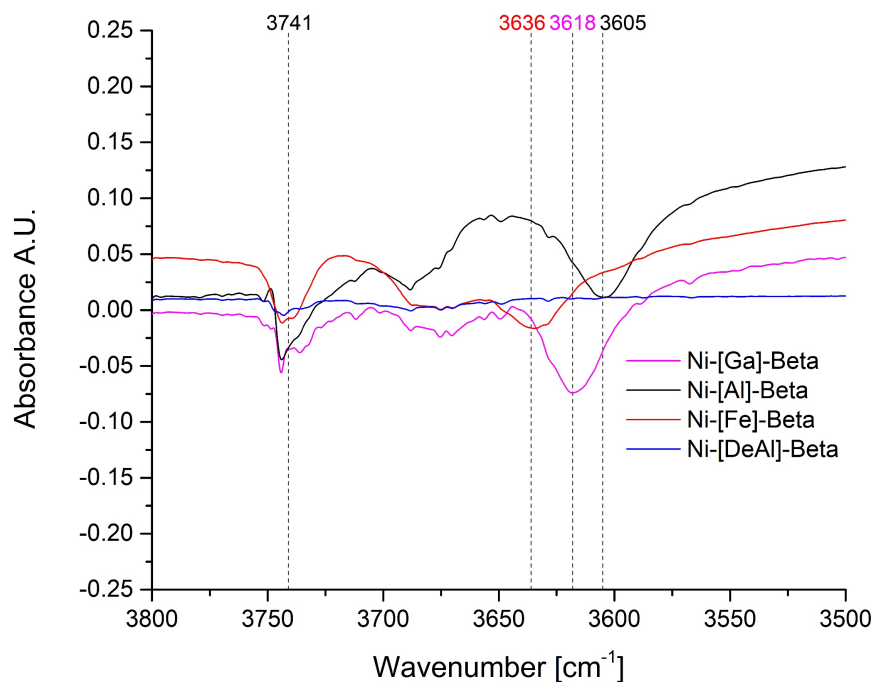

**Figure S15.** FTIR spectra of the OH region of catalysts after  $C_2H_4$  adsorption (CH region shown in Figure 1). Spectra show a decrease in the isolated silanol band ( $3741\text{ cm}^{-1}$ ) as well as acidic silanol bands ( $3605$ ,  $3618$ , and  $3636\text{ cm}^{-1}$  respectively) for Ni-[Al]-, -[Ga]-, and -[Fe]-Beta catalysts

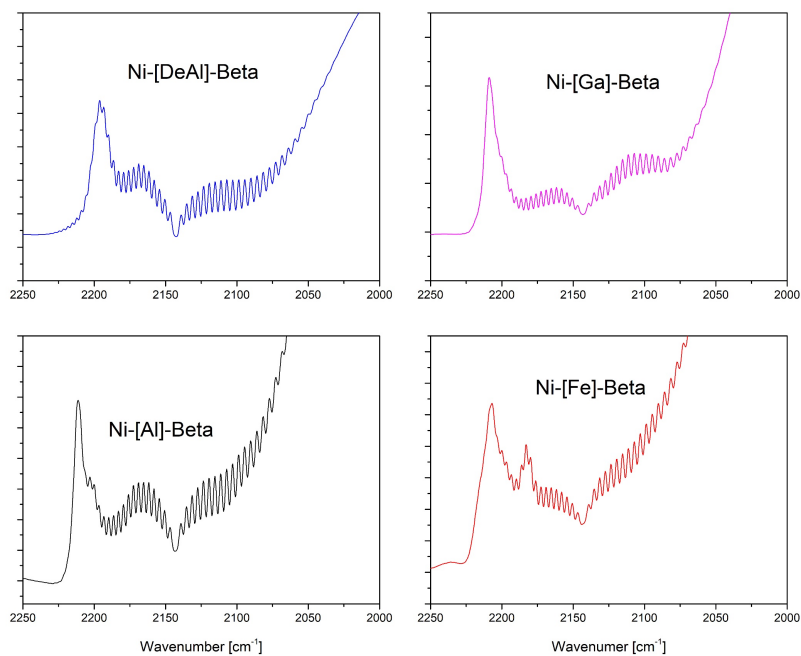

**Figure S16.** FTIR spectra of CO adsorption of catalysts after oxidative treatment to remove  $Ni(acac)_2$  ligands. Spectra show  $Ni^{2+}$  ( $2197$ ,  $2209$ ,  $2212$ , and  $2206\text{ cm}^{-1}$ ) in all catalysts as well as  $Fe^{2+}$  ( $2183\text{ cm}^{-1}$ ) in the Ni-[Fe]-Beta catalyst (band assignments seen in Table 2).
